# Supplementary material for: Interfacial synthesis of lollipop-like Au–polyaniline nanocomposites for catalytic applications
Source: Royal Society of Chemistry journal article supplement (doi:10.1039/c6ra15446h), 2016-01-01
Supplement: c6ra15446h1.pdf [file c6ra15446h1.pdf]

## Electronic Supplemental Information

### Interfacial synthesis of lollipop-like Au-polyaniline nanocomposites for catalytic applications

Wen Jin, Li Han, Xijiang Han\*, Bin Zhang, and Ping Xu\*

School of Chemistry and Chemical Engineering, Harbin Institute of Technology,  
Harbin 150001, China. Email: pxu@hit.edu.cn; hanxijiang@hit.edu.cn.

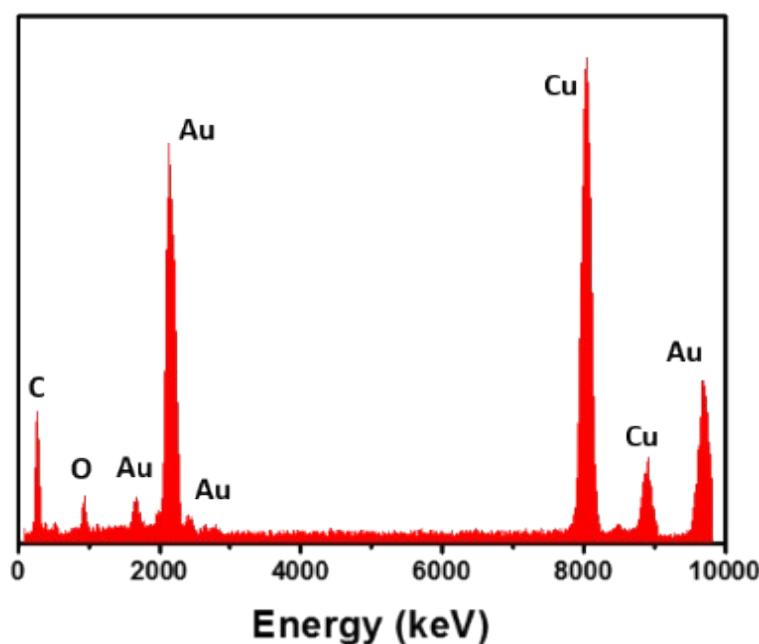

**Fig. S1.** EDX spectrum of lollipop-like Au-PANI nanoparticles at a reaction time of 1h.

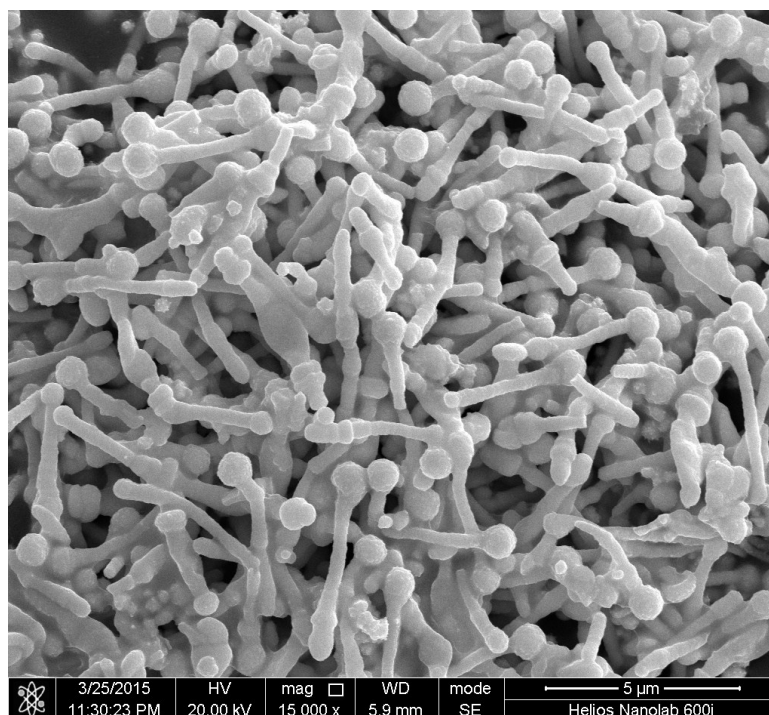

**Fig. S2.** SEM image of lollipop-like Au-PANI nanocomposites when 0.1 ml of 10 mM HAuCl<sub>4</sub> was added into the water phase for a reaction time of 1 h.

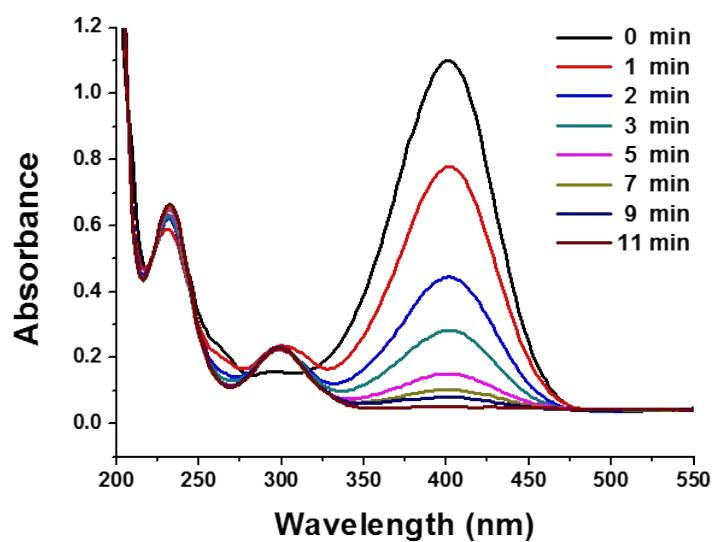

**Fig. S3.** UV-Vis absorption spectra showing the reduction of 4-NP by NaBH<sub>4</sub> in the presence of lollipop-like Au-PANI nanocomposites obtained at a reaction time of 1h.

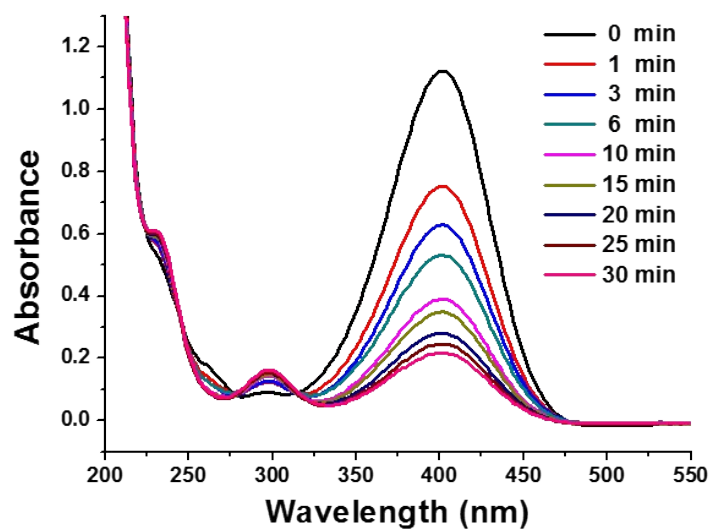

**Fig. S4.** UV-Vis absorption spectra showing the reduction of 4-NP by  $\text{NaBH}_4$  in the presence of Au-PANI nanocomposites obtained at a reaction time of 1h with 5ml of 10mM  $\text{HAuCl}_4$  added into the water phase.

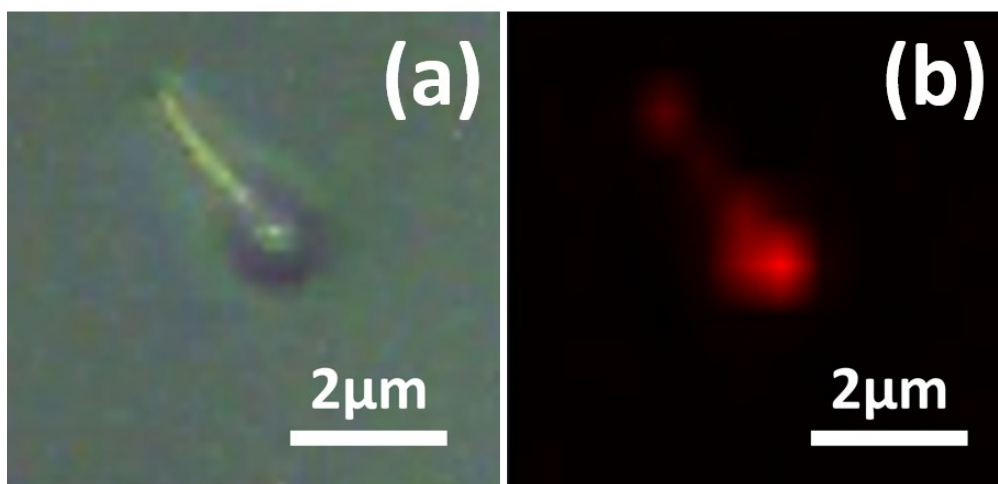

**Fig. S5.** (a) Optical photograph of Au-PANI nanostructure under the microscopy with a 100 $\times$  objective and (b) SERS mapping of Au-PANI at peak 1435  $\text{cm}^{-1}$  of the N=N band.

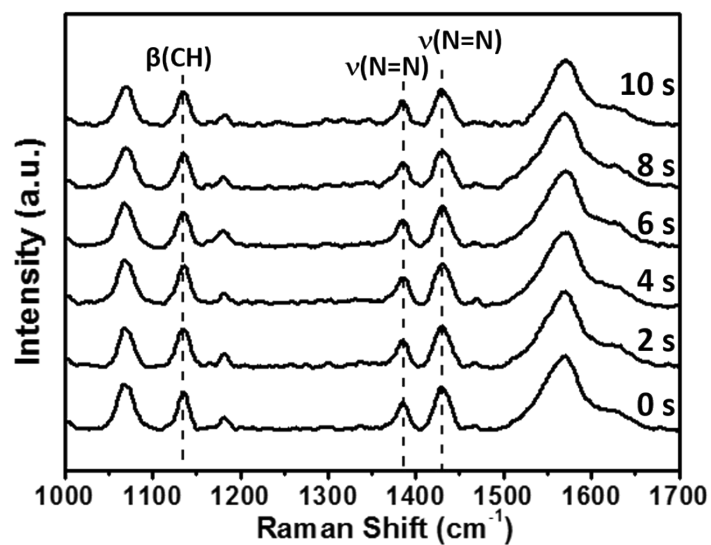

**Fig. S6.** Time-dependent SERS spectra of 4-ATP dimerizing to DMAB on Au-PANI nanospheres obtained at a reaction time of 1h with 5ml of 10mM  $\text{HAuCl}_4$  added into the water phase, under continuous 633 nm laser excitation with a laser power of 1.5 mW.

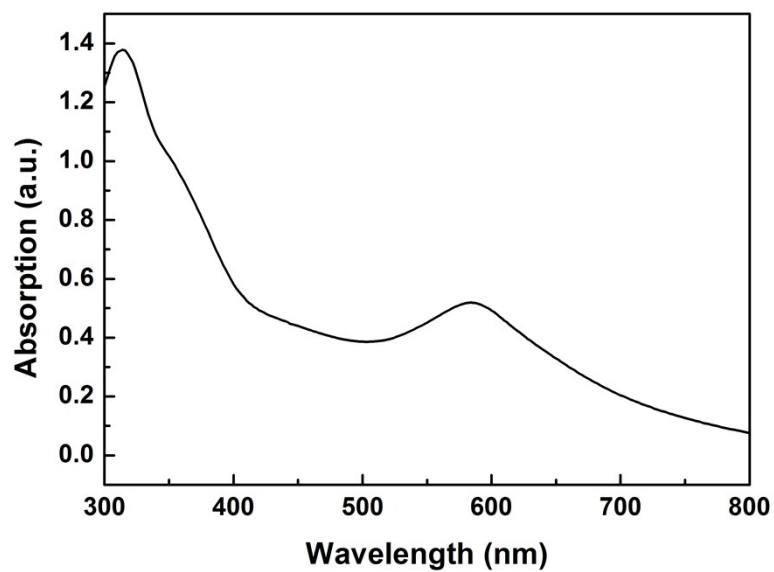

**Fig. S7.** UV-Vis absorption spectrum of the spherical Au-PANI nanocomposites.
